# Supplementary material
Source: PubMed Central journal article supplement (PMC8662071)
Supplement: bloodBLD2021012536-suppl1.pdf [file bloodBLD2021012536-suppl1.pdf]

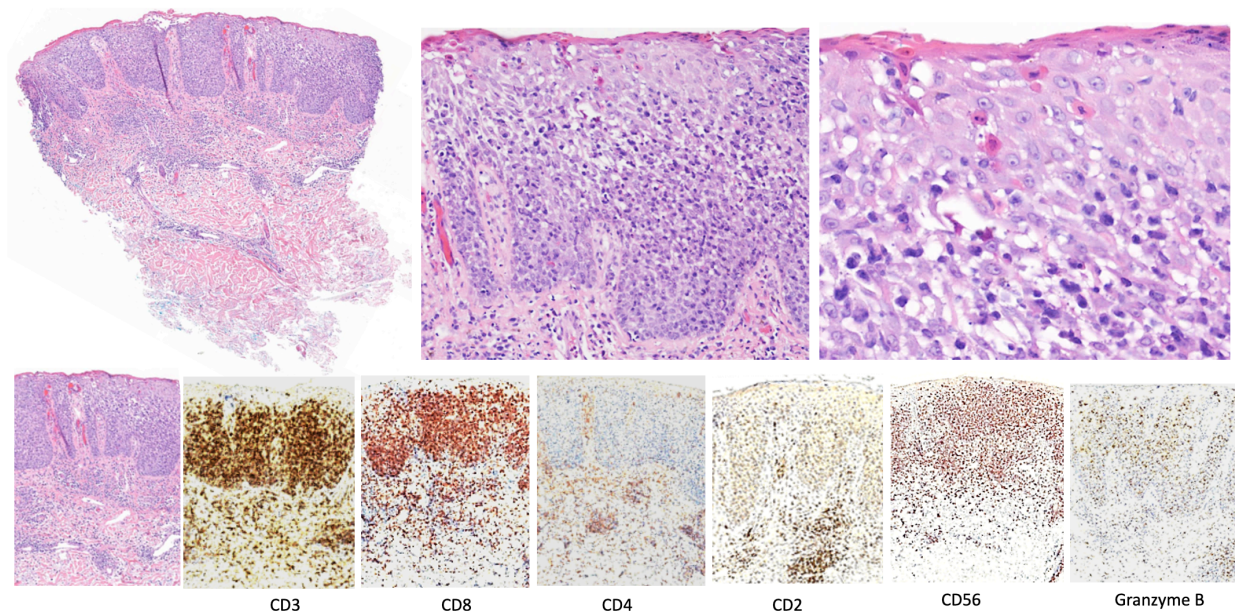

**Supplemental Figure 1. Histological features of primary cutaneous CD8+ aggressive epidermotropic T cell lymphoma.** The hematoxylin & eosin-stained and immuno-stained slides for case MGH6 reveals pagetoid epidermotropism. The lymphocytic infiltrate is CD3+, CD8+, CD4-, weakly CD2+, CD56+, and granzyme B positive.

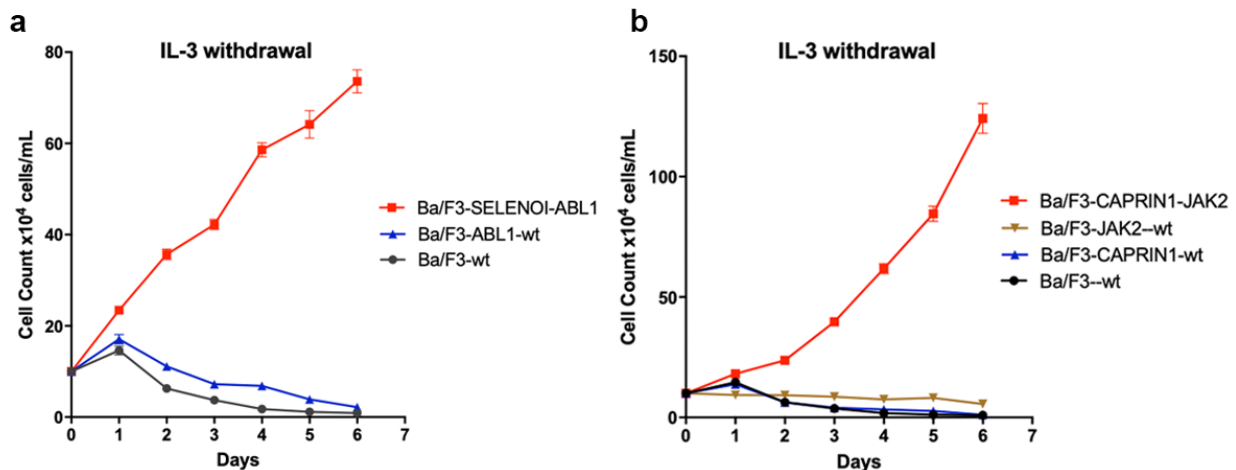

**Supplemental Figure 2. Kinase fusions confer IL-3 independent growth.**

**a.** Retroviruses encoding SENENOI-ABL1, wildtype ABL1, and empty vector controls were transduced into Ba/F3 cells. Stable cells were seeded without IL-3 at  $10^5$  cells/mL. Viable cells were manually counted daily. **b.** Retroviruses encoding CAPRIN1-JAK2, wildtype JAK2, wildtype CAPRIN1, and empty vector were transduced into Ba/F3. Stable cells were seeded without IL-3 at  $10^5$  cells/mL, and viable cells were manually counted daily. All assays were performed in triplicate.

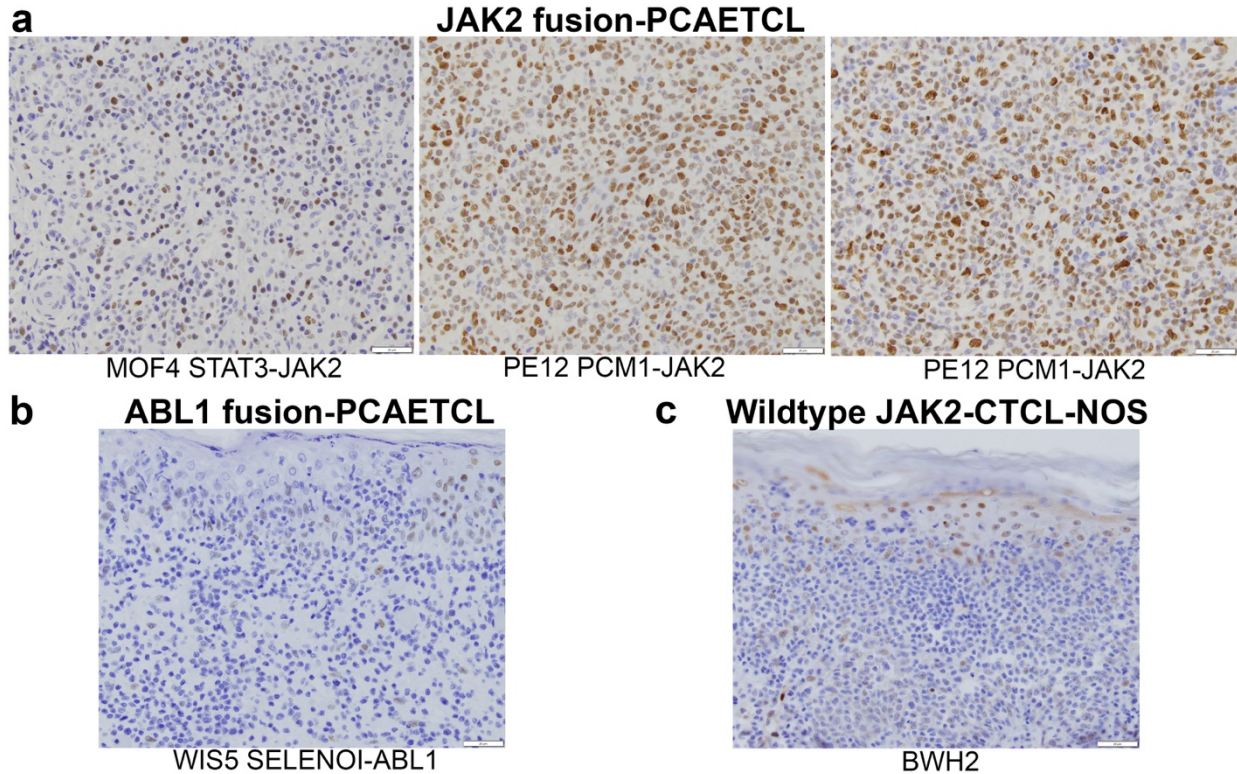

**Supplemental Figure 3. JAK2 fusion positive PCAETCLs are positive for pSTAT3.** **a.** Three JAK2 fusion positive PCAETCL, **b.** 1 ABL1 fusion positive PCAETCL, and **c.** a wildtype JAK2 CTCL-NOS were selected for immunohistochemistry with phospho-STAT3 (**pSTAT3**). Formalin-fixed paraffin-embedded sections (4 microns in thickness) from each sample were subjected to dewaxing, rehydration, and staining for phospho-STAT3 on a Leica Bond III automated immunostainer. Following antigen retrieval in EDTA buffer for 20 min at 100°C, pSTAT3 staining was performed using a rabbit monoclonal (Cell Signaling Technology, clone D3A7) diluted 1:100 in Bond Primary Diluent. Primary antibody was applied for 30 min and staining was then developed using the Leica Biosystems Refine Detection Kit. Sections were counterstained with hematoxylin. PCAETCL cases with JAK2 fusions were positive for pSTAT3. The PCAETCL with SELENOI-ABL1 and the CTCL-NOS, BWH2, were negative for pSTAT3.

**Supplemental Table 1. List of somatic single nucleotide variants from PCAETCL and CTCL-NOS.** Position refers to amino acid position. AA change = amino acid change.  
\* = stop codon

| Sample | Gene   | Position | AA Change | Alteration Type     |
|--------|--------|----------|-----------|---------------------|
| UT22   | JAK3   | 906      | p.P906S   | nonsynonymous SNV   |
| NU9    | STAT3  | 661      | p.D661Y   | nonsynonymous SNV   |
| NU9    | JUNB   | 282      | p.A282V   | nonsynonymous SNV   |
| NU11   | STAT3  | 714      | p.P714L   | nonsynonymous SNV   |
| NU14   | JAK1   | 1097     | p.G1097D  | nonsynonymous SNV   |
| UT22   | KMT2D  | 3967     | p.Q3967*  | nonsense            |
| NU1    | CDKN2A | 80       | p.R80*    | nonsense            |
| NU1    | CREBBP | 160      | p.G160fs  | frameshift deletion |
| NU4    | KMT2D  | 353      | p.Q353*   | nonsense            |
| NU6    | NR3C1  | 479      | p.R479*   | nonsense            |
| NU11   | SH2B3  | None     | splicing  | splice site         |
| NU7    | SOCS1  | 108      | p.Q108*   | nonsense            |
| NU7    | CDKN1B | 53       | p.E53*    | nonsense            |
